# Supplementary material for: Enhanced action of apigenin and naringenin combination on estrogen receptor activation in non-malignant colonocytes: implications on sorghum-derived phytoestrogens
Source: Royal Society of Chemistry journal article supplement (doi:10.1039/c4fo00300d), 2014-12-16
Supplement: c4fo00300d1.pdf [file c4fo00300d1.pdf]

A.

B.

C.

|            | 2 | bV | bE | mV | mE |        |
|------------|---|----|----|----|----|--------|
| Er $\beta$ |   |    |    |    |    | ←55kDa |
| B-actin    |   |    |    |    |    | ←42kDa |
